# Supplementary material
Source: MDPI journal article supplement (https://www.mdpi.com/2075-163X/11/4/356)
Supplement: s1 [file s1]

## SUPPLEMENTARY MATERIAL

**Table S1.** Yield expressed in percentage 12% humidity in 2018 of each fertilizer treatment (mean  $\pm$  standard deviation).

| YIELD                |                     |
|----------------------|---------------------|
| Fertilizer Treatment | Kg ha <sup>-1</sup> |
| 250 MgSS             | 10341.7 $\pm$ 260.4 |
| 500 MgSS             | 9566.2 $\pm$ 290.4  |
| 1000 MgSS            | 9336.3 $\pm$ 282.1  |
| 2000 MgSS            | 7855.2 $\pm$ 719.8  |
| MinFert              | 10083.9 $\pm$ 188.2 |
| Control              | 3961.4 $\pm$ 354.2  |

**Table S2.** Yield expressed in percentage 12% humidity in 2018 of the treatments that had received SS and those that had not received SS (mean  $\pm$  standard deviation).

| YIELD      |                       |
|------------|-----------------------|
| Treatment  | Kg ha <sup>-1</sup>   |
| With SS    | 9274.83 $\pm$ 307.38  |
| Without SS | 7022.67 $\pm$ 4329.24 |

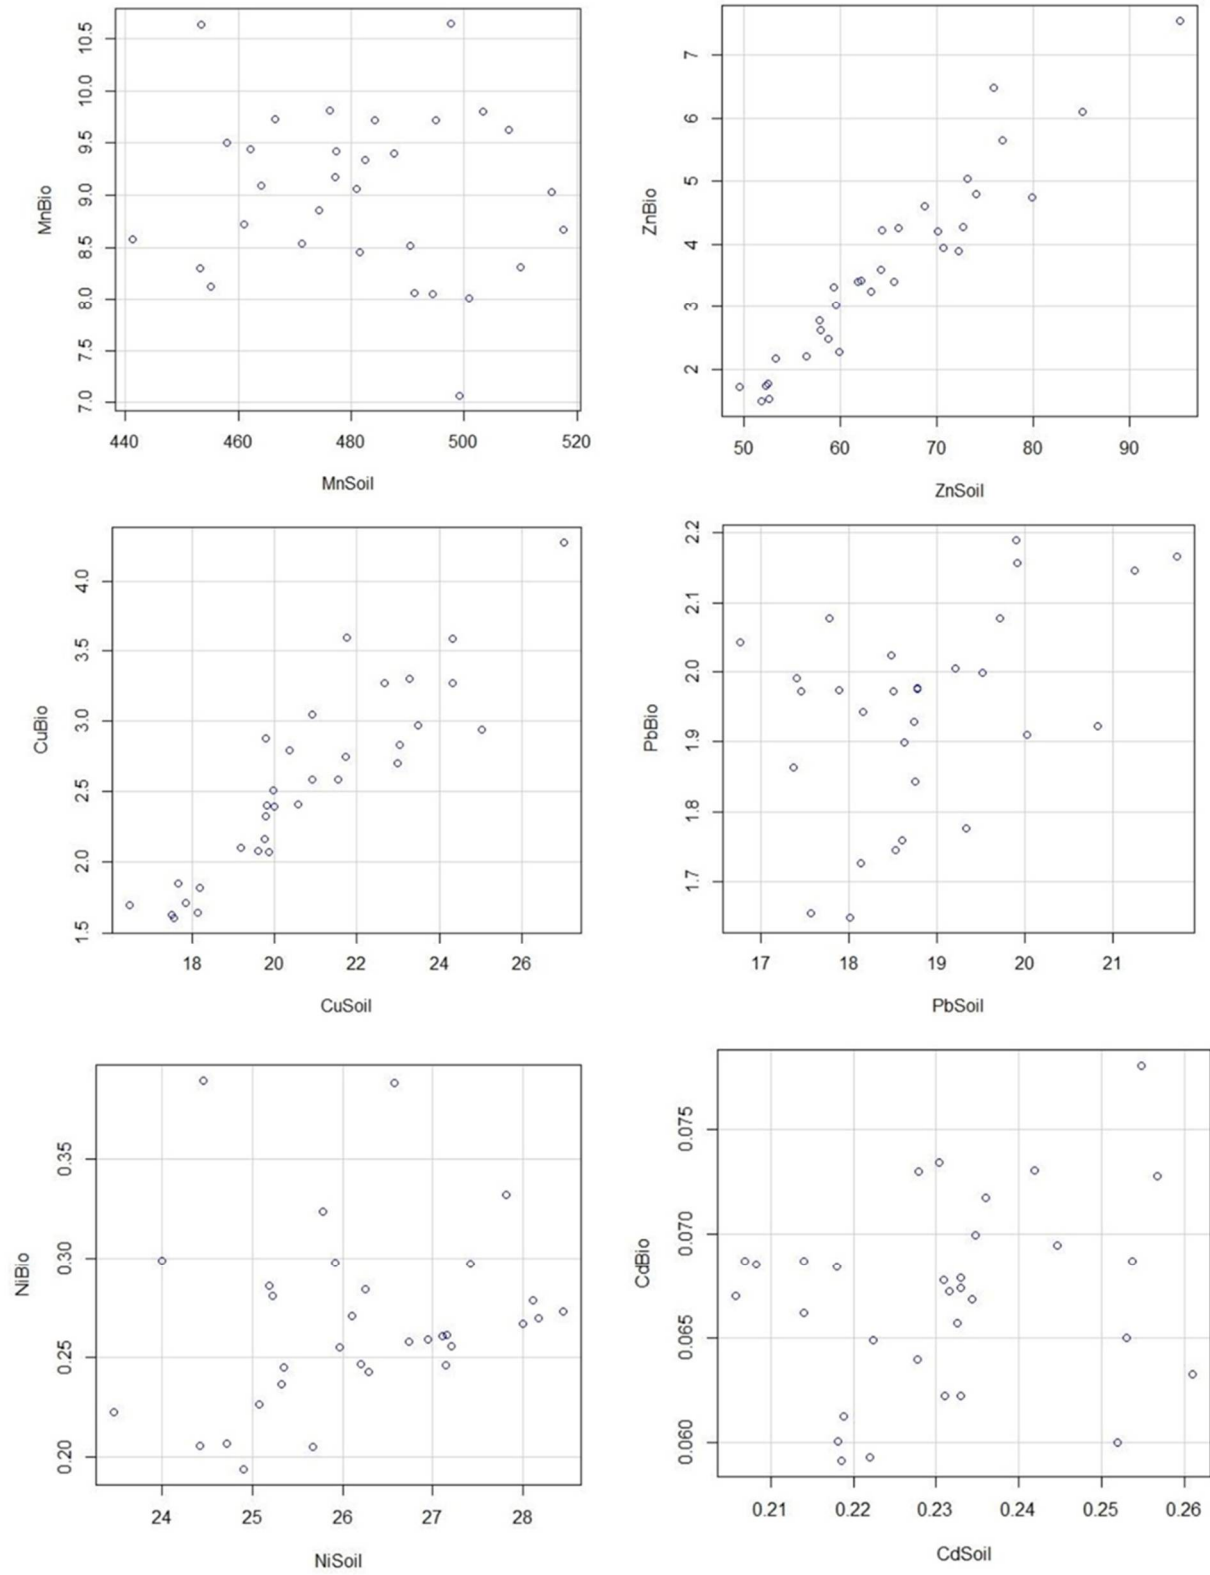

**Figure S1.** Total TM concentration (TMSoil) vs Extractable TM concentration by DTPA (TMBio).
